# Supplementary material for: Temperature- and solvent-controlled dimensionality in a zinc 6-(1H-benzoimidazol-2-yl)pyridinecarboxylate system
Source: Royal Society of Chemistry journal article supplement (doi:10.1039/b819800d), 2009-01-01

# Electronic Supporting Information

For

## Temperature- and solvent-controlled dimensionality in a zinc 6-(1H-benzoimidazol-2-yl)pyridinecarboxylate system

Xiao-Ming Lin,<sup>a</sup> Hua-Cai Fang,<sup>a</sup> Zheng-Yuan Zhou,<sup>a</sup> Li Chen,<sup>a</sup> Jing-Wei Zhao,<sup>b</sup>  
Shi-Zheng Zhu<sup>b</sup> and Yue-Peng Cai<sup>\*a</sup>

<sup>a</sup>*School of Chemistry and Environment, School of Chemistry and Environment, Key Lab of Technology on Electrochemical Energy Storage and Power Generation in Guangdong Universities, South China Normal University, Guangzhou 510006, P. R. China.*

<sup>b</sup>*Shanghai Institute of Organic Chemistry, Chinese Academy of Science, Shanghai, 20032, P. R. China.*

## Contents

Fig. **S1** The thermal analyses (N2) of the crystalline **1**, **2** and **5** (TG curves)

Table **S2**. Selected bond distances (Å) and bond angles (°) for three complexes **1**, **2** and **5**.

Table **S3** Table **3** Distances (Å) and angles (°) of hydrogen bonds for compounds **1**, **2** and **5**

Fig. **S4** ORTEP plot of coordination environment of Zn(II) center in complex **3** with partial atomic labels, and guest molecules  $[\text{H}_2\text{N}(\text{CH}_3)_2]^+$  are omitted for clarity.

Symmetry code a: 0.5-x, 0.5-y, 1-z; b: 0.5-x, 0.5+y, 1-z; c: x, -y, 0.5+z.

Fig. **S5** 3D metal-organic framework with 3D channels containing the guest motifs

$[\text{H}_2\text{N}(\text{CH}_3)_2]^+$  in complex **3**.

Fig. **S6** ORTEP plot of two coordination geometries of Zn(II) centers in complex **4** with atomic labels.

Fig. **S7** 3D metal-organic framework with 3D channels in **4**.

Fig. **S8** 3D network in **5** constructed by  $\pi \cdots \pi$  stacking and O-H $\cdots$ O hydrogen bonding interactions in *ac* plane.

Fig. **S9** HOMO and LUMO diagrams for **1**, **2** and **5**.

## Fig. S1

(a) for compound **1**

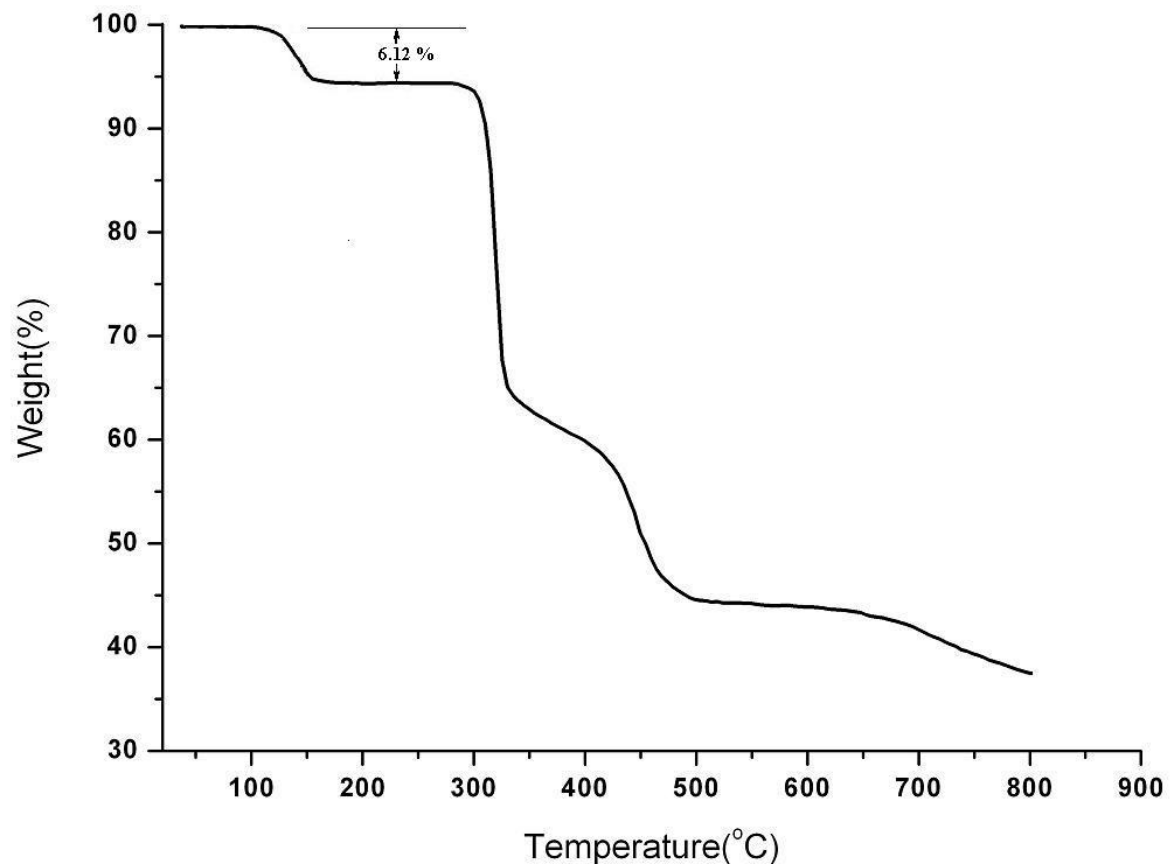

(b) for compound 2

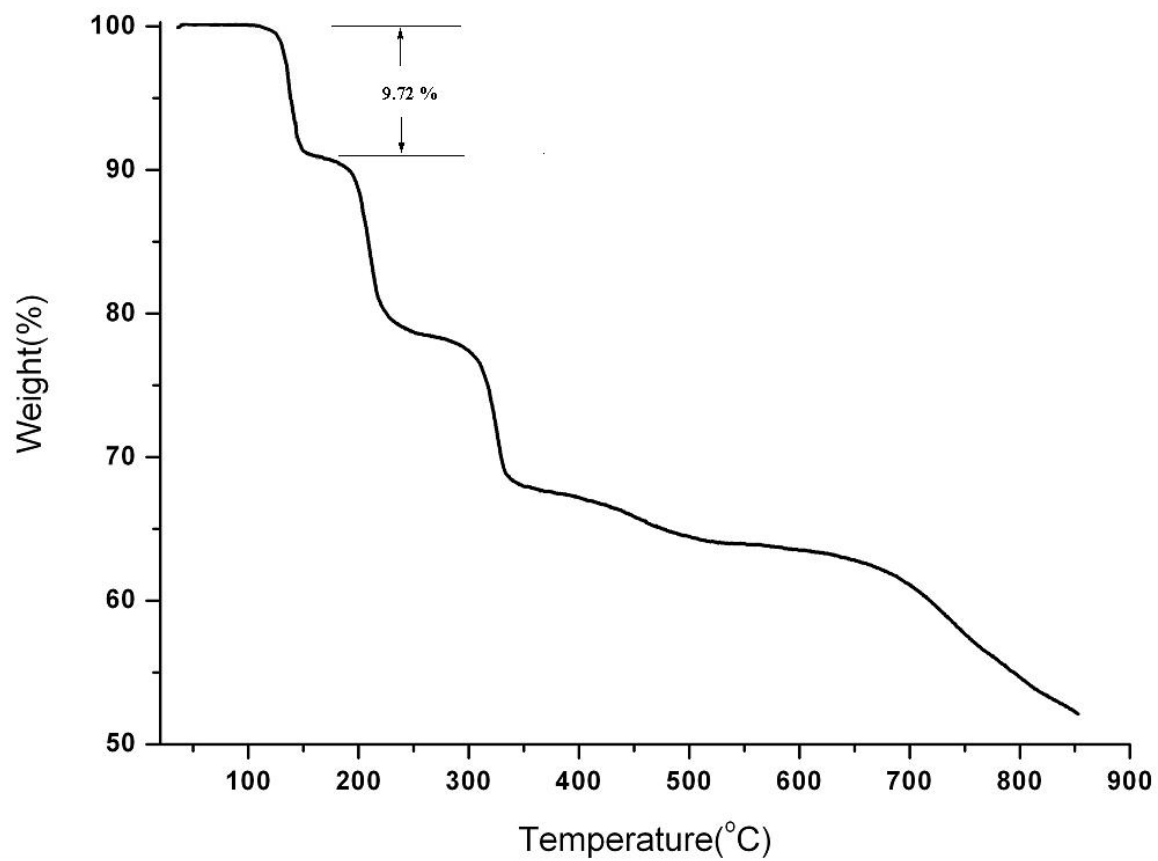

(c) for compound 5

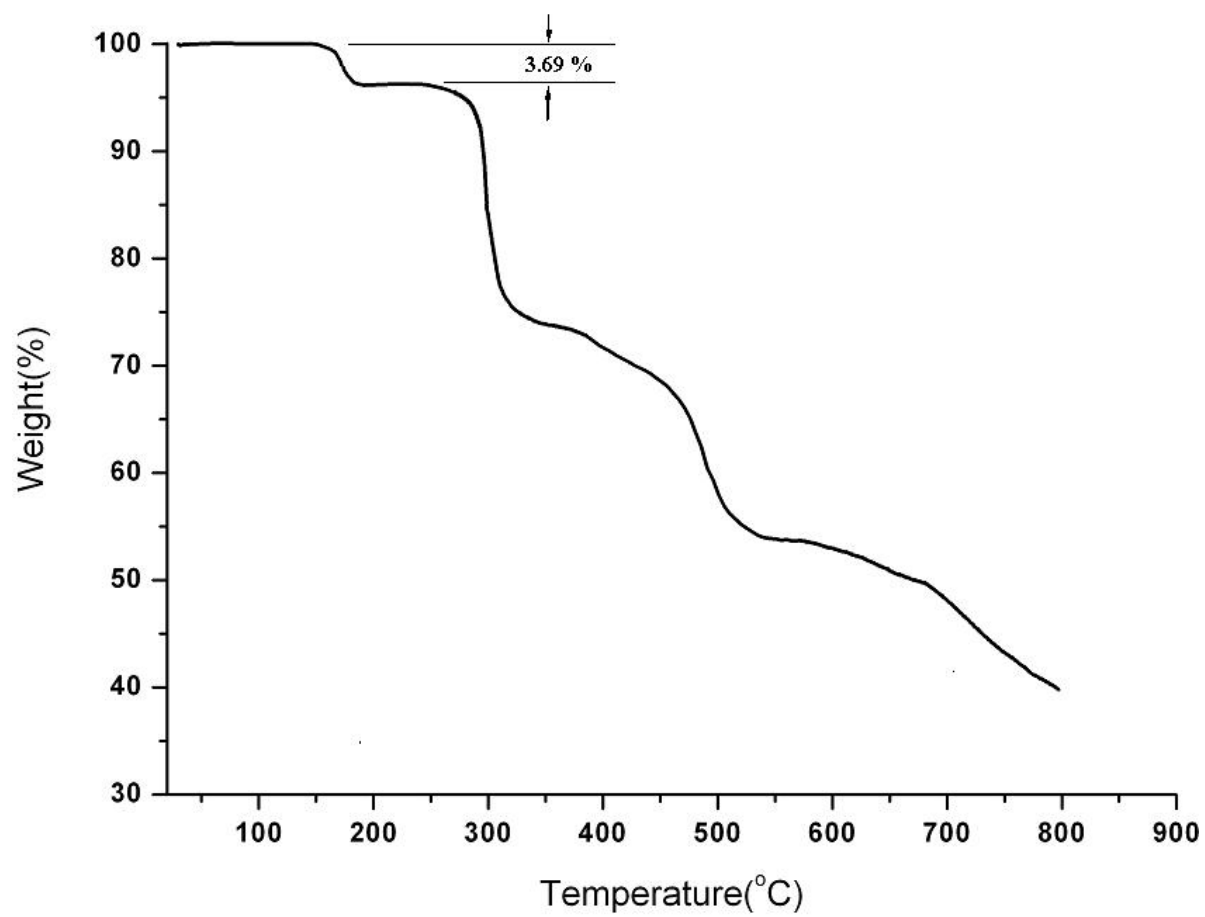

Selected bond distances (Å) and bond angles (°) for three complexes **1**, **2** and **5**<sup>a</sup>

| <b>1</b>          |            |                   |            |
|-------------------|------------|-------------------|------------|
| Zn(1)-N(1)        | 2.2093(15) | N(6)-Zn(1)-N(3)   | 178.57(5)  |
| Zn(1)-N(3)        | 1.9725(13) | N(6)-Zn(1)-N(4)   | 79.12(5)   |
| Zn(1)-N(4)        | 2.1188(12) | N(3)-Zn(1)-N(4)   | 99.84(5)   |
| Zn(1)-N(6)        | 1.9481(13) | N(6)-Zn(1)-O(3)   | 78.81(5)   |
| Zn(1)-O(1)        | 2.2891(14) | N(3)-Zn(1)-O(3)   | 102.14(5)  |
| Zn(1)-O(3)        | 2.1304(12) | N(4)-Zn(1)-O(3)   | 157.48(5)  |
| N(6)-Zn(1)-N(1)   | 102.62(6)  | N(3)-Zn(1)-N(1)   | 78.45(6)   |
| N(4)-Zn(1)-N(1)   | 96.81(5)   | O(3)-Zn(1)-N(1)   | 92.32(5)   |
| N(6)-Zn(1)-O(1)   | 102.44(5)  | N(3)-Zn(1)-O(1)   | 76.55(5)   |
| N(4)-Zn(1)-O(1)   | 91.28(5)   | O(3)-Zn(1)-O(1)   | 89.12(5)   |
| N(1)-Zn(1)-O(1)   | 154.69(5)  |                   |            |
| <b>2</b>          |            |                   |            |
| Zn(1)-N(1)        | 2.040(2)   | O(3)-Zn(1)-N(3)   | 161.02(9)  |
| Zn(1)-N(3)        | 1.933(2)   | O(3)-Zn(1)-O(1)   | 97.46(8)   |
| Zn(1)-O(1)        | 2.0370(18) | N(3)-Zn(1)-O(1)   | 80.12(8)   |
| Zn(1)-O(3)        | 1.9040(18) | O(3)-Zn(1)-N(1)   | 99.12(8)   |
| Zn(1)-O(2)#1      | 2.2993(19) | N(3)-Zn(1)-N(1)   | 80.02(8)   |
| O(3)-Zn(1)-O(2)#1 | 92.05(8)   | O(1)-Zn(1)-N(1)   | 159.04(8)  |
| O(1)-Zn(1)-O(2)#1 | 96.53(7)   | N(3)-Zn(1)-O(2)#1 | 106.91(8)  |
| N(1)-Zn(1)-O(2)#1 | 95.61(7)   |                   |            |
| <b>5</b>          |            |                   |            |
| Zn(1)-N(1)        | 1.927(3)   | N(1)-Zn(1)-O(3)   | 168.81(12) |
| Zn(1)-N(2)        | 2.048(3)   | N(1)-Zn(1)-N(2)   | 80.16(11)  |
| Zn(1)-O(1)        | 2.050(2)   | O(3)-Zn(1)-N(2)   | 99.09(11)  |
| Zn(1)-O(2)#2      | 2.242(2)   | N(1)-Zn(1)-O(1)   | 79.90(10)  |
| Zn(1)-O(3)        | 1.934(3)   | O(3)-Zn(1)-O(1)   | 98.61(11)  |
| O(2)-Zn(1)#3      | 2.242(2)   | N(1)-Zn(1)-O(2)#2 | 97.28(10)  |
| N(2)-Zn(1)-O(1)   | 157.87(10) | N(2)-Zn(1)-O(2)#2 | 100.35(10) |
| O(3)-Zn(1)-O(2)#2 | 93.84(11)  | O(1)-Zn(1)-O(2)#2 | 91.60(9)   |

<sup>a</sup>Symmetry transformations used to generate equivalent atoms: #1 -x+1,y-1/2,-z+1/2; #2 -x+1,y-1/2,-z+3/2; #3 -x+1,y+1/2,-z+3/2.

**Table S3** Distances (Å) and angles (°) of hydrogen bonds for compounds **1**, **2** and **5**<sup>b</sup>

| D-H...A                | d(H...A)  | d(D...A)   | ∠D-H...A  |
|------------------------|-----------|------------|-----------|
| <b>1</b>               |           |            |           |
| O(1W)-H(1WA)...O(2)#1  | 2.067(9)  | 2.753(3)   | 138.1(13) |
| O(2W)-H(2WB)...O(3W)   | 2.168(13) | 2.927(7)   | 150.7(17) |
| O(3W)-H(3WA)...O(2W)   | 2.245(13) | 2.927(7)   | 138.6(11) |
| N(2)-H(2)...O(3)#2     | 2.132(12) | 2.8839(18) | 145.3(12) |
| N(5)-H(5)...O(1)#3     | 2.101(12) | 2.8291(16) | 142.0(12) |
| C(16)-H(16)...O(2W)    | 2.668(12) | 3.436(7)   | 140.4(11) |
| C(23)-H(23)...O(3W)    | 2.528(13) | 3.330(7)   | 144.7(12) |
| <b>2</b>               |           |            |           |
| O(1W)-H(1WA)...O(4)#4  | 1.923(13) | 2.752(3)   | 168(3)    |
| O(1W)-H(1WB)...O(2)#5  | 2.204(19) | 3.001(3)   | 158(4)    |
| O(2W)-H(2WB)...O(1W)#6 | 1.934(14) | 2.762(3)   | 167(3)    |
| O(2W)-H(2WA)...O(4)#7  | 2.07(2)   | 2.842(3)   | 153(3)    |
| O(2W)-H(2WA)...O(3)#7  | 2.61(3)   | 3.209(3)   | 129(4)    |
| N(2)-H(2)...O(2W)#1    | 1.91(3)   | 2.767(3)   | 171.6     |
| Cg1...Cg2              |           | 3.582      |           |
| Cg1...Cg1a             |           | 3.782      |           |
| <b>5</b>               |           |            |           |
| O(8)-H(8A)...O(7)#1    | 2.31(8)   | 2.950(6)   | 170(10)   |
| O(8)-H(8B)...O(4)#8    | 2.05(7)   | 2.870(5)   | 154(7)    |
| N(3)-H(3)...O(8)#9     | 1.90(7)   | 2.754(4)   | 177(6)    |
| C(5)-H(5)...O(5)#10    | 2.56(6)   | 3.182(5)   | 135(7)    |
| Cg1...Cg2              |           | 3.510      |           |
| Cg1...Cg1a             |           | 3.867      |           |

<sup>b</sup>Symmetry transformation used to generate equivalent atoms: #1 x,y,z-1; #2 -x+1,-y+2,-z+1; #3 -x+2,-y+2,-z+2; #4 x-1,y,z; #5 x,y,z; #6 x,-y+1/2,z+1/2; #7 -x+1,-y+1,-z+1; #8 -x,-y+1,-z+1; #9 x,y,z+; #10 x,2+y,z. Cg1 (benzimidale), Cg1a (pyridine) and Cg2 respectively denote the centroids of six-membered and five-membered rings in the asymmetrical ligand HL.





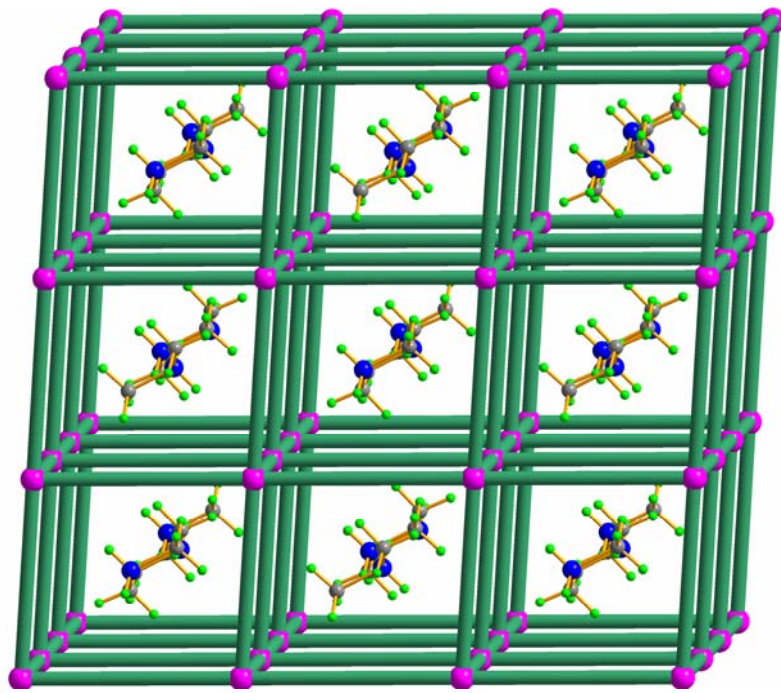

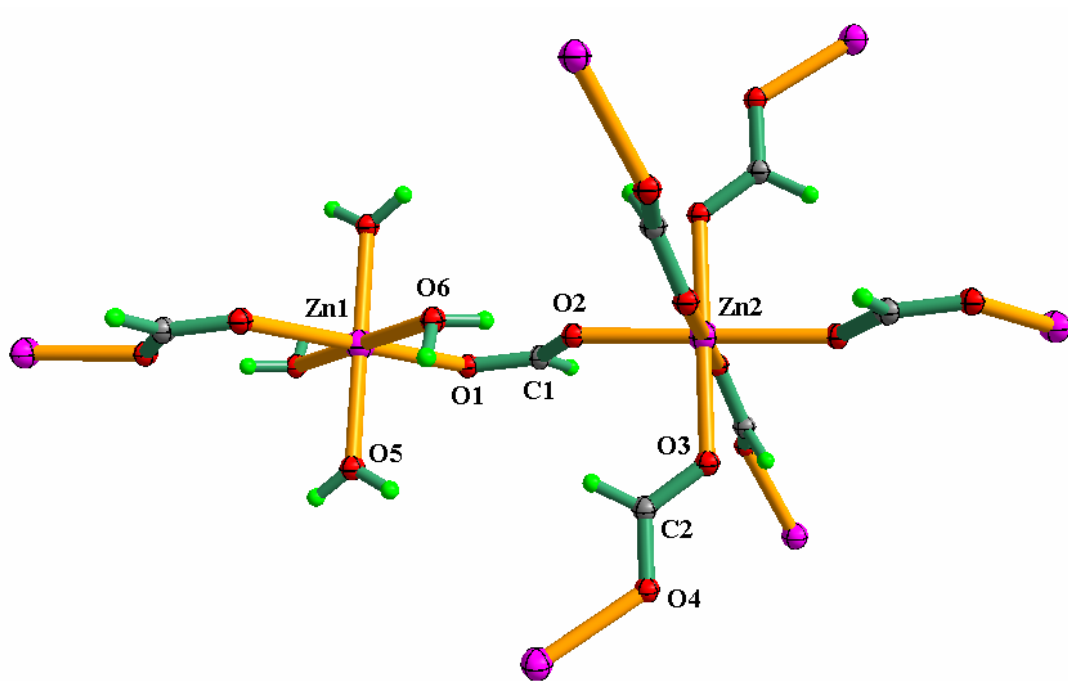

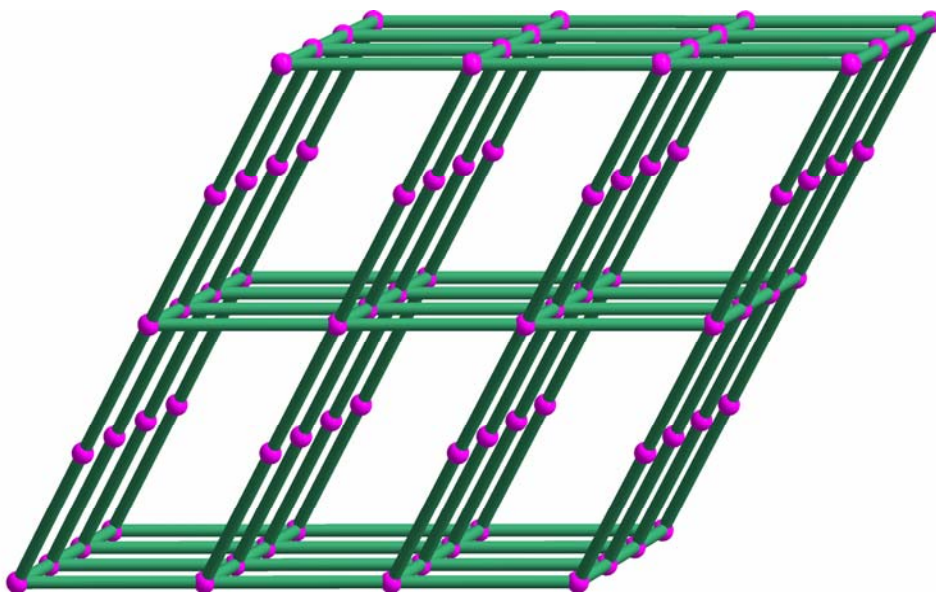

**Fig. S8**

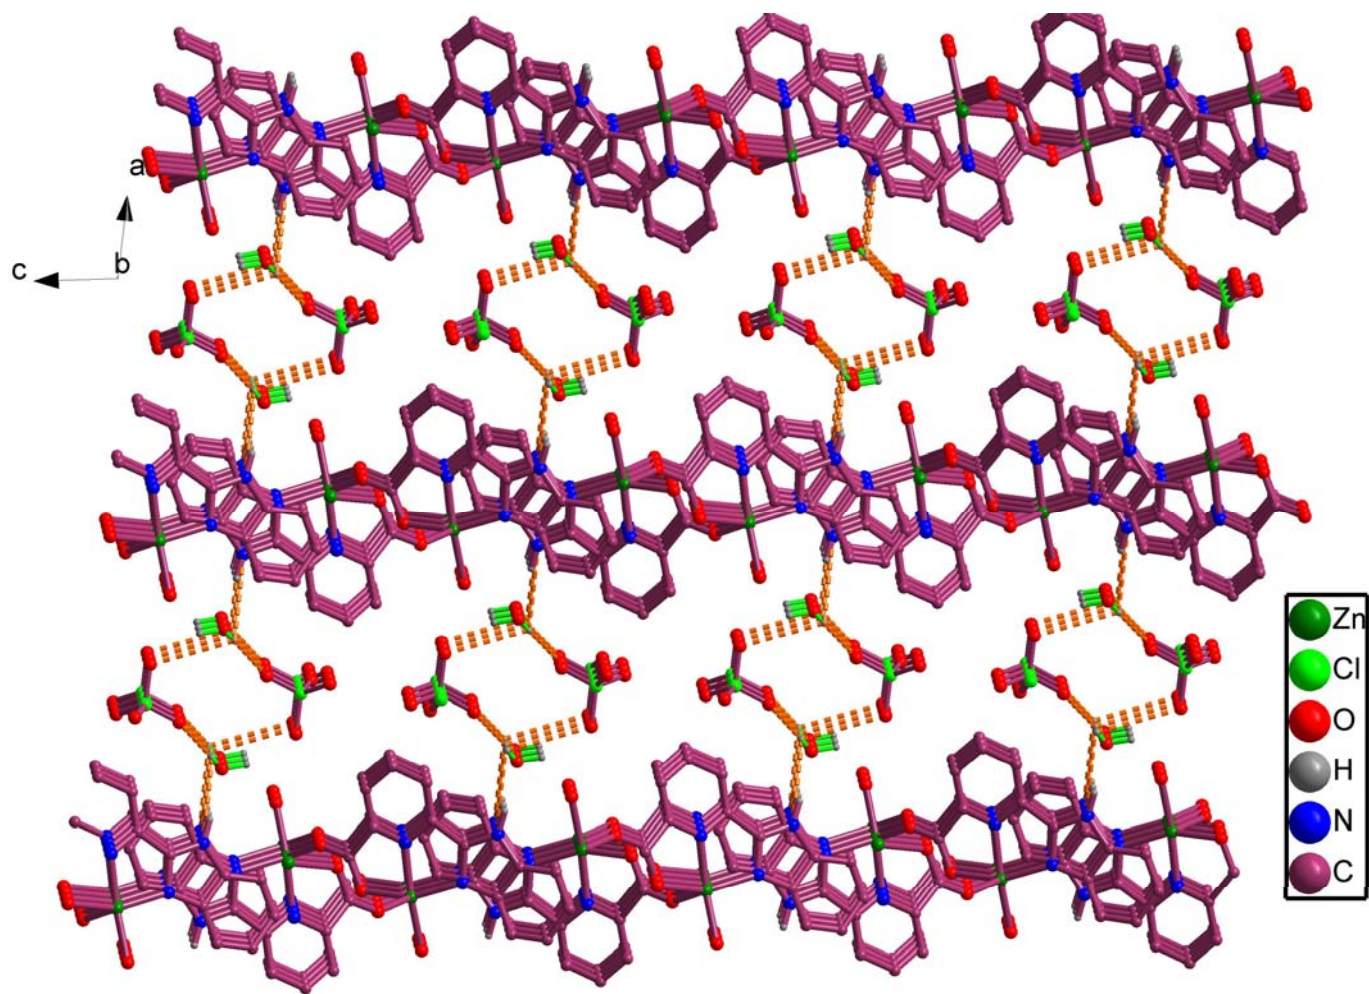

**Fig. S9**

**(a) For 1**

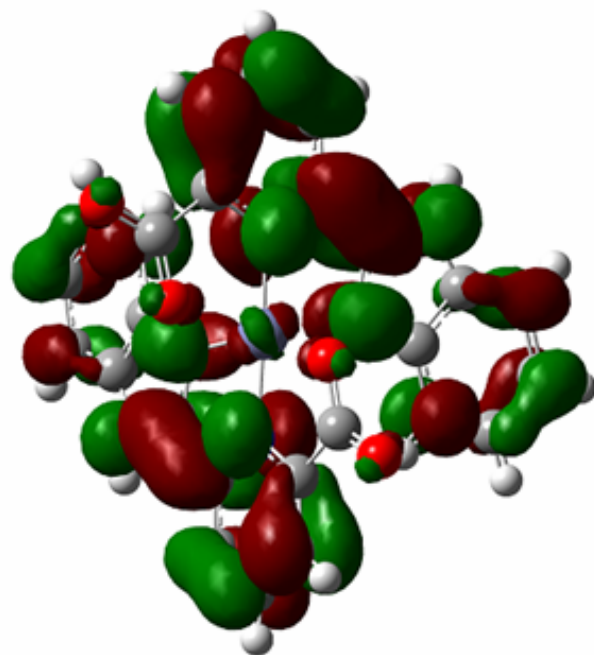

**LUMO**

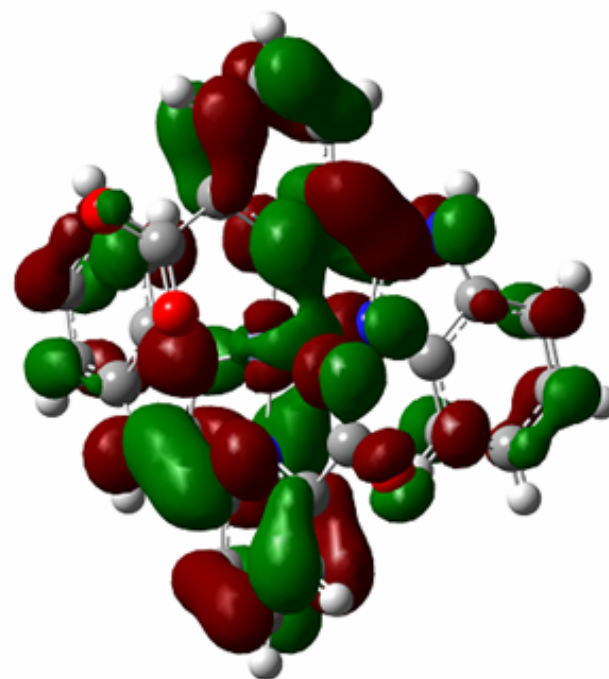

**HOMO**

**(b) for 2**

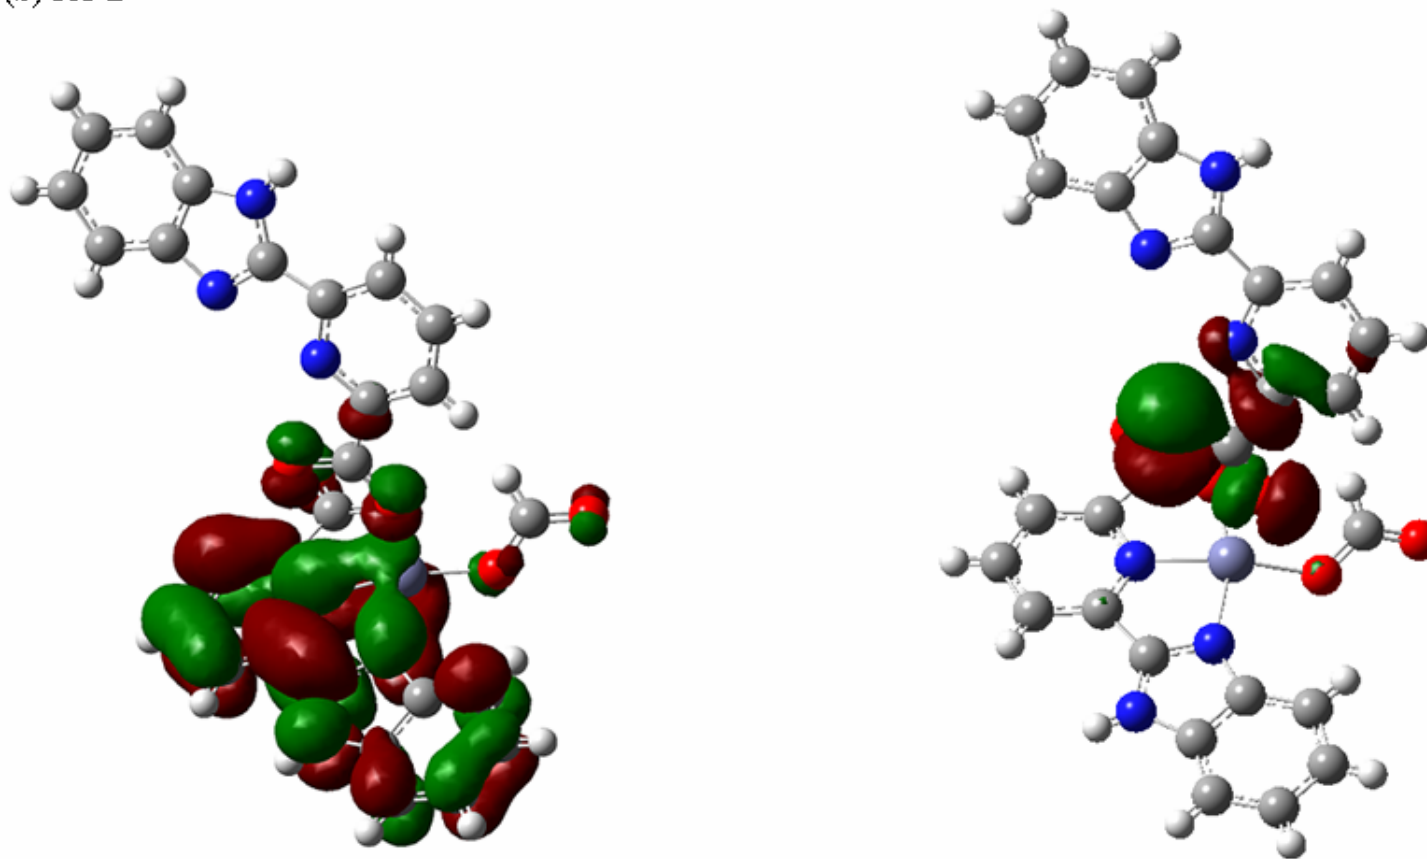

**(c) for 5**

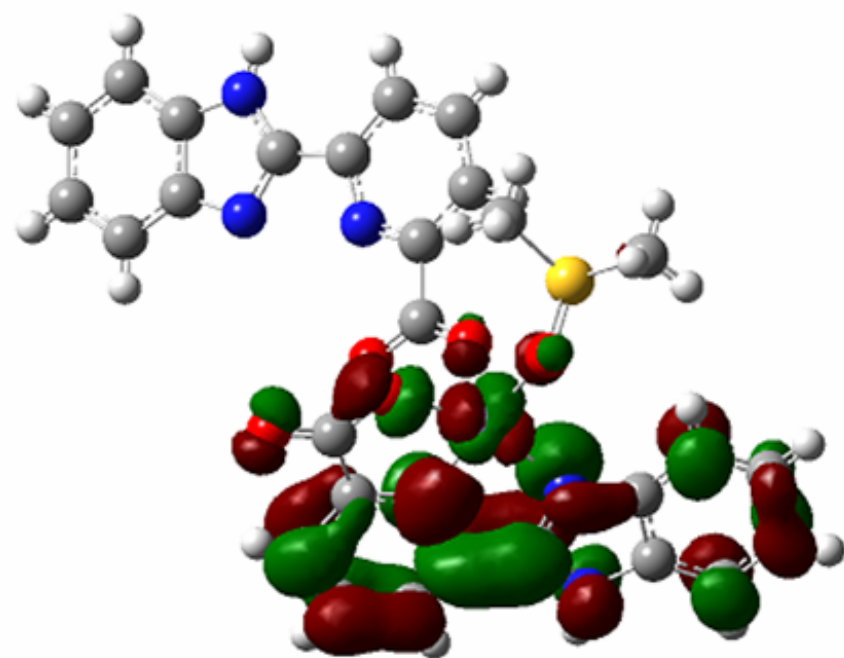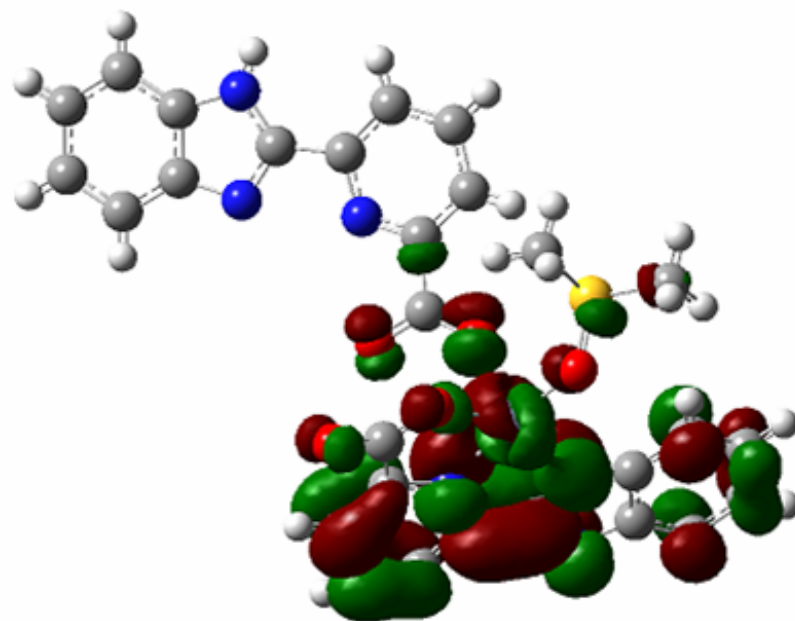

Supplement: b819800d.pdf [file b819800d.pdf]
